# Supplementary material for: The effect of sodium thiosulfate on cytotoxicity of a diimine Re(i) tricarbonyl complex
Source: Royal Society of Chemistry journal article supplement (doi:10.1039/d1dt00517k), 2021-01-01
Supplement: d1dt00517k1.pdf [file d1dt00517k1.pdf]

*Electronic Supplementary Information*

Effect of Sodium Thiosulfate on Cytotoxicity of a  
Diimine Re(I) Tricarbonyl Complex

*Miles S. Capper,<sup>a</sup> Alejandra Enriquez Garcia,<sup>a</sup> Barry Lai,<sup>b</sup> Owen Baiwen Wang,<sup>a</sup> Benjamin S.  
Gelfand,<sup>a</sup> Carrie S. Shemanko,<sup>c</sup> and Farideh Jalilehvand<sup>a,\*</sup>*

<sup>a</sup> Department of Chemistry, University of Calgary, Calgary, Alberta, T2N 1N4, Canada

<sup>b</sup> Advanced Photon Source, X-ray Science Division, Argonne National Laboratory, Argonne, USA

<sup>c</sup> Department of Biological Sciences, University of Calgary, Calgary, Alberta, T2N 1N4, Canada

## Table of Content

|                                                                                                                                                                                                                                                                                                                                                                                                                                                                            | <u>Page</u> |
|----------------------------------------------------------------------------------------------------------------------------------------------------------------------------------------------------------------------------------------------------------------------------------------------------------------------------------------------------------------------------------------------------------------------------------------------------------------------------|-------------|
| Physical measurements and methods (NMR, FT-IR, ESI-MS, TGA)                                                                                                                                                                                                                                                                                                                                                                                                                | S-2         |
| <b>Table S1.</b> Crystal data for $\{\text{Na}(\text{fac}-[\text{Re}(\text{CO})_3(\text{bpy})(\text{S}_2\text{O}_3)]) \cdot 1.75\text{H}_2\text{O} \cdot \text{C}_2\text{H}_5\text{OH}\}_4$ <i>i.e.</i> $(2 \cdot 0.75\text{H}_2\text{O} \cdot \text{C}_2\text{H}_5\text{OH})_4$ and $(\text{fac}-[\text{Re}(\text{CO})_3(\text{bpy})(\text{H}_2\text{O})])(\text{fac}-[\text{Re}(\text{CO})_3(\text{bpy})(\text{S}_2\text{O}_3)]) \cdot 4\text{H}_2\text{O}$ ( <b>3</b> ) | S-3         |
| <b>Table S2.</b> Selected bond lengths for compound $(2 \cdot 0.75\text{H}_2\text{O} \cdot \text{C}_2\text{H}_5\text{OH})_4$                                                                                                                                                                                                                                                                                                                                               | S-4         |
| <b>Table S3.</b> Selected bond angles for compound $(2 \cdot 0.75\text{H}_2\text{O} \cdot \text{C}_2\text{H}_5\text{OH})_4$                                                                                                                                                                                                                                                                                                                                                | S-5         |
| <b>Table S4.</b> Selected bond lengths for compound <b>3</b>                                                                                                                                                                                                                                                                                                                                                                                                               | S-6         |
| <b>Table S5.</b> Selected bond angles for compound <b>3</b>                                                                                                                                                                                                                                                                                                                                                                                                                | S-7         |
| <b>Table S6.</b> Survey of Re(I) tricarbonyl compounds with an S-donor ligand in CSD                                                                                                                                                                                                                                                                                                                                                                                       | S-8         |
| <b>Figure S1 (a).</b> $^1\text{H}$ and $^{13}\text{C}$ NMR spectra of $\text{fac}-[\text{Re}(\text{CO})_3(\text{bpy})(\text{H}_2\text{O})](\text{CF}_3\text{SO}_3)$ ( <b>1</b> )                                                                                                                                                                                                                                                                                           | S-9         |
| <b>Figure S1 (b).</b> $^1\text{H}$ and $^{13}\text{C}$ NMR spectra of $\text{Na}(\text{fac}-[\text{Re}(\text{CO})_3(\text{bpy})(\text{S}_2\text{O}_3)]) \cdot \text{H}_2\text{O}$ ( <b>2</b> )                                                                                                                                                                                                                                                                             | S-10        |
| <b>Figure S2.</b> FT-IR spectra of <b>1</b> and <b>2</b>                                                                                                                                                                                                                                                                                                                                                                                                                   | S-11        |
| <b>Figure S3.</b> ESI-mass spectra of <b>2</b> in (+) and (-) ion modes                                                                                                                                                                                                                                                                                                                                                                                                    | S-12        |
| <b>Table S7.</b> Assignments of mass peaks in the ESI-mass spectra shown in Figure S3                                                                                                                                                                                                                                                                                                                                                                                      | S-12        |
| <b>Figure S4.</b> Thermal gravimetric analysis (TGA) of <b>2</b>                                                                                                                                                                                                                                                                                                                                                                                                           | S-13        |
| <b>Figure S5 (a-c).</b> XFM elemental distribution map of MDA-MB-231 cells treated with <b>1</b> , <b>2</b> or DMEM for 6 h                                                                                                                                                                                                                                                                                                                                                | S-14        |
| <b>Figure S6.</b> XFM spectra of MDA-MB-231 cells treated for 6 h with <b>1</b> , <b>2</b> or DMEM                                                                                                                                                                                                                                                                                                                                                                         | S-17        |
| <b>References</b>                                                                                                                                                                                                                                                                                                                                                                                                                                                          | S-18        |

## Physical Measurements and Methods

### *NMR Spectroscopy*

<sup>1</sup>H and <sup>13</sup>C-NMR spectroscopy measurements were carried out at room temperature by means of a Bruker AVIII-600 CFI-600 spectrometer using D<sub>2</sub>O as a solvent. <sup>1</sup>H NMR were internally referenced to the HOD/H<sub>2</sub>O peak at 4.80 ppm,<sup>1</sup> with a total of 64 scans being co-added. Using the UDEFT pulse sequence and broadband proton decoupling at 151 MHz, <sup>13</sup>C NMR spectra were recorded. <sup>13</sup>C NMR spectra were externally calibrated using CH<sub>3</sub>OH in D<sub>2</sub>O resonating at 49.15 ppm,<sup>2</sup> with a total of 4000 scans being co-added. A 30° pulse, 26.2 kHz sweep width, 1-s delay between scans, and 65 K data points were used.

### *FT-IR Spectroscopy*

500 scans were measured using an Agilent Cary 630 FTIR with a diamond ATR accessory.

### *ESI-Mass spectrometry*

Electrospray ionization (ESI) mass spectra were collected both in positive (+) and (-) modes by means of an Agilent 6520 Accurate-Mass Q-TOF. An aqueous solution of **2** was injected and mobilized using an injection flow rate of 0.2 mL/min. The source was held at 200 °C with a drying gas flow rate of 7 L/min and a nebulizer pressure of 12 p.s.i. The fragmentor, capillary, and skimmer voltages were set to 80, 4000 and 65 V, respectively. Peak assignments were confirmed using a high-resolution Isotope Distribution Calculator from Scientific Instrument Services.<sup>3</sup>

### *Thermogravimetric Analysis (TGA)*

TGA was performed using a Netzsch STA 409 PC Luxx instrument. The analyses were run from room temperature to 600 °C using a ramp rate of 2 °C min<sup>-1</sup> under a flow of N<sub>2</sub>.

## Crystallography Data

**Table S1.** Crystal Data and Structure Refinement for the Compounds:

{Na(*fac*-[(CO)<sub>3</sub>Re(bpy)(S<sub>2</sub>O<sub>3</sub>)]) · 1.75H<sub>2</sub>O · C<sub>2</sub>H<sub>5</sub>OH}<sub>4</sub> (**2** · 0.75H<sub>2</sub>O · C<sub>2</sub>H<sub>5</sub>OH)<sub>4</sub> and

(*fac*-[Re(CO)<sub>3</sub>(bpy)(H<sub>2</sub>O)])(*fac*-[Re(CO)<sub>3</sub>(bpy)(S<sub>2</sub>O<sub>3</sub>)])·4H<sub>2</sub>O (**3**).<sup>a</sup>

|                                                                             | <b>2</b> · 0.75H <sub>2</sub> O · C <sub>2</sub> H <sub>5</sub> OH                                            | <b>3</b>                                                                                      |
|-----------------------------------------------------------------------------|---------------------------------------------------------------------------------------------------------------|-----------------------------------------------------------------------------------------------|
| Empirical formula                                                           | C <sub>60</sub> H <sub>70</sub> N <sub>8</sub> Na <sub>4</sub> O <sub>35</sub> Re <sub>4</sub> S <sub>8</sub> | C <sub>26</sub> H <sub>26</sub> N <sub>4</sub> O <sub>14</sub> Re <sub>2</sub> S <sub>2</sub> |
| Formula weight (g mol <sup>-1</sup> )                                       | 2556.48                                                                                                       | 1055.03                                                                                       |
| Crystal system                                                              | monoclinic                                                                                                    | monoclinic                                                                                    |
| Space group                                                                 | P2 <sub>1</sub> /n                                                                                            | Pc                                                                                            |
| <i>a</i> (Å)                                                                | 18.1076(4)                                                                                                    | 8.09140(10)                                                                                   |
| <i>b</i> (Å)                                                                | 18.6534(4)                                                                                                    | 7.8966(2)                                                                                     |
| <i>c</i> (Å)                                                                | 24.5013(6)                                                                                                    | 26.1412(5)                                                                                    |
| α (deg)                                                                     | 90                                                                                                            | 90                                                                                            |
| β (deg)                                                                     | 92.749(2)                                                                                                     | 98.6020(10)                                                                                   |
| γ (deg)                                                                     | 90                                                                                                            | 90                                                                                            |
| <i>V</i> (Å <sup>3</sup> )                                                  | 8266.2(3)                                                                                                     | 1651.49(6)                                                                                    |
| <i>Z</i>                                                                    | 4                                                                                                             | 2                                                                                             |
| <i>D</i> <sub>calcd</sub> (g/cm <sup>3</sup> )                              | 2.054                                                                                                         | 2.122                                                                                         |
| <i>T</i> (K)                                                                | 173.0                                                                                                         | 173.0                                                                                         |
| λ (Å)                                                                       | 1.54178 (Cu Kα)                                                                                               | 1.54178 (Cu Kα)                                                                               |
| (μ / mm <sup>-1</sup> )                                                     | 14.061                                                                                                        | 15.942                                                                                        |
| <i>F</i> (000)                                                              | 4952                                                                                                          | 1008.0                                                                                        |
| 2θ range for data collection (deg)                                          | 5.934 to 140.138                                                                                              | 3.418 to 144.498                                                                              |
| <i>R</i> <sub>1</sub> , <i>wR</i> <sub>2</sub> [ <i>I</i> ≥ 2σ( <i>I</i> )] | 0.0700, 0.1631                                                                                                | 0.0278, 0.0715                                                                                |

$$^a R_1 = \frac{\sum ||F_0 - F_c||}{\sum |F_0|}; wR_2 = \frac{[\sum w(F_0^2 - F_c^2)^2]}{[\sum w(F_0^2)^2]}^{1/2}$$

**Table S2.** Selected Bond Lengths (Å) for Compound (**2** · 0.75H<sub>2</sub>O · C<sub>2</sub>H<sub>5</sub>OH)<sub>4</sub>

| Bond        | Distance (Å) | Bond        | Distance (Å) |
|-------------|--------------|-------------|--------------|
| Re(1)-S(1)  | 2.511(2)     | Re(3)-S(5)  | 2.522(2)     |
| Re(1)-N(1)  | 2.165(6)     | Re(3)-N(5)  | 2.184(6)     |
| Re(1)-N(2)  | 2.168(5)     | Re(3)-N(6)  | 2.169(5)     |
| Re(1)-C(11) | 1.924(7)     | Re(3)-C(37) | 1.930(7)     |
| Re(1)-C(12) | 1.937(7)     | Re(3)-C(38) | 1.930(7)     |
| Re(1)-C(13) | 1.925(7)     | Re(3)-C(39) | 1.933(7)     |
| C(11)-O(1)  | 1.143(9)     | C(37)-O(13) | 1.135(9)     |
| C(12)-O(2)  | 1.137(9)     | C(38)-O(14) | 1.142(9)     |
| C(13)-O(3)  | 1.145(9)     | C(39)-O(15) | 1.134(9)     |
| S(1)-S(2)   | 2.036(3)     | S(5)-S(6)   | 2.023(3)     |
| Re(2)-S(3)  | 2.512(2)     | Re(4)-S(7)  | 2.525(2)     |
| Re(2)-N(3)  | 2.186(6)     | Re(4)-N(7)  | 2.176(5)     |
| Re(2)-N(4)  | 2.158(5)     | Re(4)-N(8)  | 2.175(6)     |
| Re(2)-C(24) | 1.935(7)     | Re(4)-C(50) | 1.921(7)     |
| Re(2)-C(25) | 1.932(7)     | Re(4)-C(51) | 1.928(7)     |
| Re(2)-C(26) | 1.913(7)     | Re(4)-C(52) | 1.906(7)     |
| C(24)-O(7)  | 1.141(9)     | C(50)-O(19) | 1.141(9)     |
| C(25)-O(8)  | 1.138(9)     | C(51)-O(20) | 1.147(9)     |
| C(26)-O(9)  | 1.154(9)     | C(52)-O(21) | 1.906(7)     |
| S(3)-S(4)   | 2.030(3)     | S(7)-S(8)   | 2.033(3)     |

**Table S3.** Selected Bond Angles (deg) for Compound ( $2 \cdot 0.75\text{H}_2\text{O} \cdot \text{C}_2\text{H}_5\text{OH}$ )<sub>4</sub>

| Bond angle        | Degree    | Bond angle        | Degree   |
|-------------------|-----------|-------------------|----------|
| N(1)-Re(1)-N(2)   | 75.3(2)   | N(5)-Re(3)-N(6)   | 74.8(2)  |
| N(1)-Re(1)-S(1)   | 78.3(1)   | N(5)-Re(3)-S(5)   | 81.1(1)  |
| N(1)-Re(1)-C(11)  | 97.4(3)   | N(5)-Re(3)-C(38)  | 100.6(3) |
| N(1)-Re(1)-C(13)  | 95.3(3)   | N(5)-Re(3)-C(39)  | 94.5(3)  |
| C(12)-Re(1)-C(13) | 89.6(3)   | C(38)-Re(3)-C(39) | 88.1(3)  |
| Re(1)-S(1)-S(2)   | 109.77(9) | Re(3)-S(5)-S(6)   | 109.1(1) |
| N(3)-Re(2)-N(4)   | 74.6(2)   | N(7)-Re(4)-N(8)   | 74.8(2)  |
| N(3)-Re(2)-S(3)   | 78.4(1)   | N(7)-Re(4)-S(7)   | 89.5(1)  |
| N(3)-Re(2)-C(25)  | 99.4(3)   | N(7)-Re(4)-C(51)  | 173.9(3) |
| N(3)-Re(2)-C(26)  | 95.5(3)   | N(7)-Re(4)-C(52)  | 93.0(3)  |
| C(25)-Re(2)-C(26) | 87.5(3)   | C(51)-Re(4)-C(52) | 90.1(3)  |
| Re(2)-S(3)-S(4)   | 108.43(9) | Re(4)-S(7)-S(8)   | 110.1(1) |

**Table S4.** Selected Bond Lengths (Å) for Compound **3***(fac-[Re(CO)<sub>3</sub>(bpy)(H<sub>2</sub>O]))(fac-[Re(CO)<sub>3</sub>(bpy)(S<sub>2</sub>O<sub>3</sub>))]·4H<sub>2</sub>O.*

| Bond        | Distance (Å) | Bond        | Distance (Å) |
|-------------|--------------|-------------|--------------|
| Re(1)-C(11) | 1.948(12)    | Re(2)-C(24) | 1.937(11)    |
| Re(1)-C(12) | 1.915(10)    | Re(2)-C(25) | 1.929(11)    |
| Re(1)-C(13) | 1.941(11)    | Re(2)-C(26) | 1.889(11)    |
| Re(1)-N(1)  | 2.157(10)    | Re(2)-N(3)  | 2.169(9)     |
| Re(1)-N(2)  | 2.169(9)     | Re(2)-N(4)  | 2.166(9)     |
| Re(1)-S(1)  | 2.481(3)     | Re(2)-O(10) | 2.253(7)     |
| C(11)-O(4)  | 1.121(15)    | C(24)-O(7)  | 1.120(14)    |
| C(12)-O(5)  | 1.153(14)    | C(25)-O(8)  | 1.144(15)    |
| C(13)-O(6)  | 1.114(14)    | C(26)-O(9)  | 1.170(14)    |
| S(1)-S(2)   | 2.045(4)     |             |              |
| S(2)-O(1)   | 1.486(14)    |             |              |
| S(2)-O(2)   | 1.431(16)    |             |              |
| S(2)-O(3)   | 1.469(9)     |             |              |

**Table S5.** Selected Bond Angles (deg) for Compound **3**

(*fac*-[Re(CO)<sub>3</sub>(bpy)(H<sub>2</sub>O)])(*fac*-[Re(CO)<sub>3</sub>(bpy)(S<sub>2</sub>O<sub>3</sub>]])•4H<sub>2</sub>O.

| Bond              | Degree     | Bond              | Degree   |
|-------------------|------------|-------------------|----------|
| C(11)-Re(1)-N(1)  | 173.0(5)   | C(24)-Re(2)-N(3)  | 172.4(4) |
| C(12)-Re(1)-N(1)  | 98.2(4)    | C(25)-Re(2)-N(3)  | 97.8(4)  |
| C(13)-Re(1)-N(1)  | 92.4(4)    | C(26)-Re(2)-N(3)  | 95.7(4)  |
| N(1)-Re(1)-N(2)   | 75.5(4)    | N(4)-Re(2)-N(3)   | 74.6(4)  |
| C(11)-Re(1)-N(2)  | 97.7(4)    | C(24)-Re(2)-N(4)  | 99.0(4)  |
| C(12)-Re(1)-N(2)  | 172.9(4)   | C(25)-Re(2)-N(4)  | 172.1(4) |
| C(13)-Re(1)-N(2)  | 94.4(4)    | C(26)-Re(2)-N(4)  | 93.6(5)  |
| C(11)-Re(1)-S(1)  | 94.8(4)    | C(24)-Re(2)-O(10) | 90.0(4)  |
| C(12)-Re(1)-S(1)  | 88.4(3)    | C(25)-Re(2)-O(10) | 92.9(4)  |
| C(13)-Re(1)-S(1)  | 175.0(3)   | C(26)-Re(2)-O(10) | 177.6(4) |
| N(1)-Re(1)-S(1)   | 83.7(3)    | N(3)-Re(2)-O(10)  | 85.6(3)  |
| N(2)-Re(1)-S(1)   | 87.7(2)    | N(4)-Re(2)-O(10)  | 84.8(4)  |
| C(12)-Re(1)-C(11) | 88.5(5)    | C(25)-Re(2)-C(24) | 88.5(5)  |
| C(13)-Re(1)-C(11) | 89.5(5)    | C(26)-Re(2)-C(24) | 88.6(5)  |
| C(12)-Re(1)-C(13) | 89.1(5)    | C(25)-Re(2)-C(26) | 89.0(5)  |
| S(2)-S(1)-Re(1)   | 109.65(15) |                   |          |



**Table S6.** Survey of Re(I) tricarbonyl complexes with an S-donor ligand in CSD version 5.38 (2017).

| CSD Code                      | Reference                                               | Structure                                                                           | Re-S (Å)      | Re-CO <sub>axial</sub> (Å) |
|-------------------------------|---------------------------------------------------------|-------------------------------------------------------------------------------------|---------------|----------------------------|
| ERUFII                        | <i>Inorg.Chim. Acta</i> ,<br><b>2017</b> , 460, 127-133 | 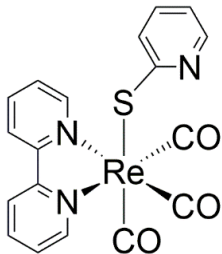   | 2.4945(13)    | 1.924(6)                   |
| ERUFOO                        | <i>Inorg.Chim. Acta</i> ,<br><b>2017</b> , 460, 127-133 |   | 2.5428(10)    | 1.931(3)                   |
| EXACAH                        | <i>Chem. Eur. J.</i> ,<br>2004, <b>10</b> , 1765-1777.  |   | 2.496(2)      | 1.919(10)                  |
| RUMPUL                        | <i>Dalton Trans.</i> ,<br>2009, 4458-4467.              |  | 2.5012(13)    | 1.927(5)                   |
| <b>Average Distance ± SD:</b> |                                                         |                                                                                     | 2.509 ± 0.023 | 1.925 ± 0.005              |

*NMR Spectroscopy*

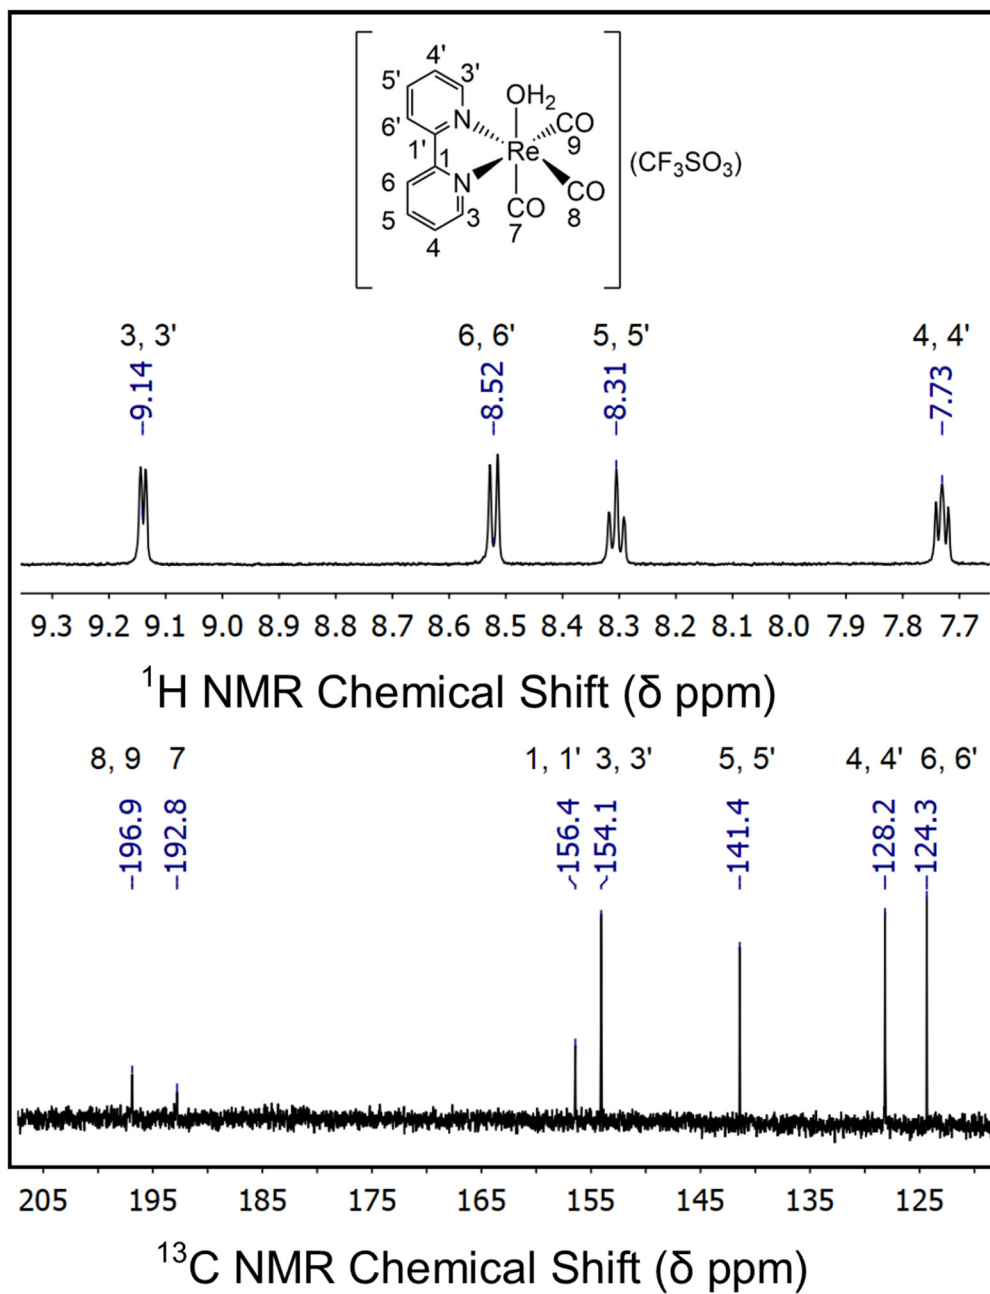

**Figure S1 (a)**  $^1H$  and  $^{13}C$  NMR of  $fac-[Re(CO)_3(bpy)(H_2O)](CF_3SO_3)$  (1) in  $D_2O$

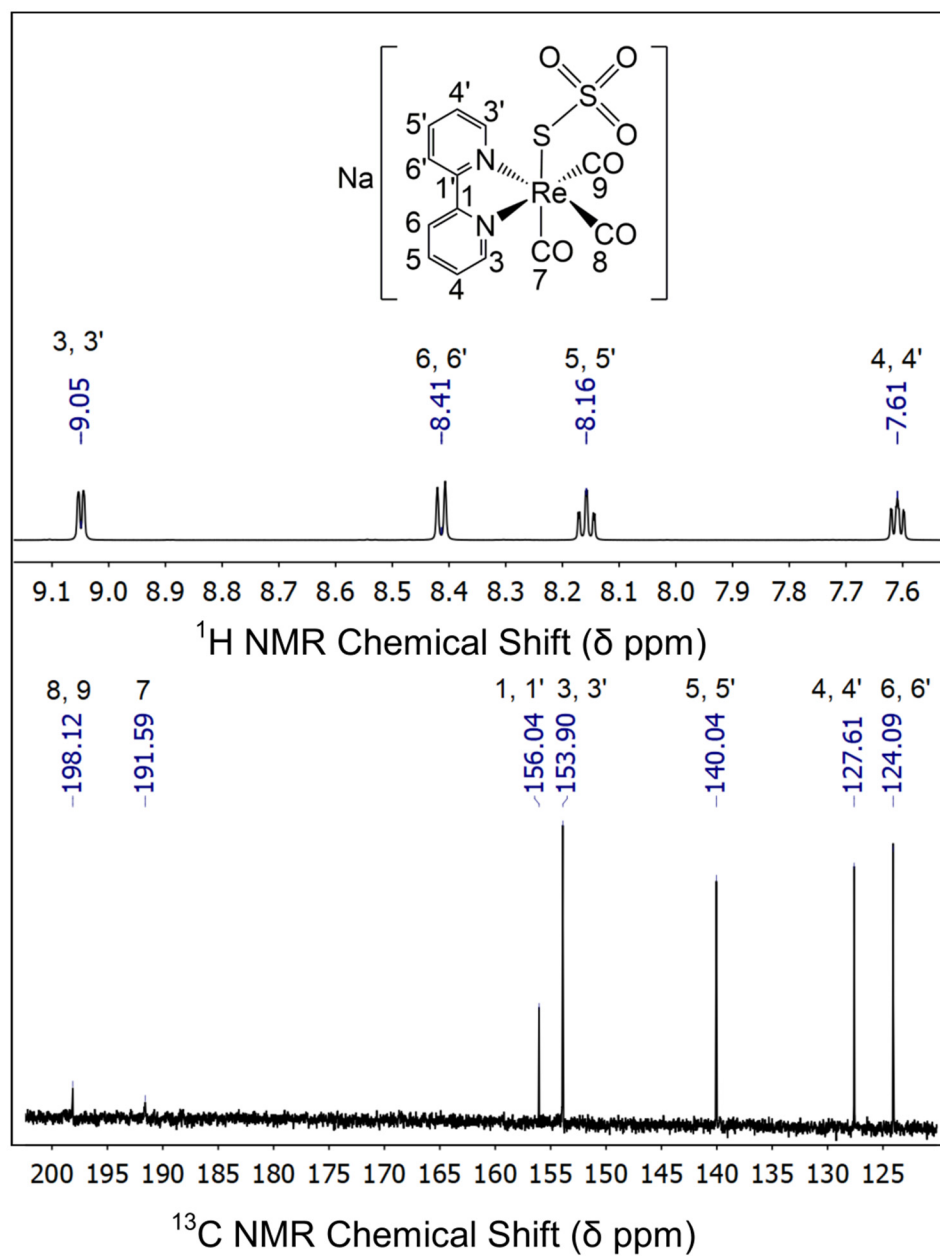

**Figure S1 (b)**  $^1\text{H}$  NMR and  $^{13}\text{C}$  NMR spectra of  $\text{Na}[\text{fac}-[\text{Re}(\text{CO})_3(\text{bpy})(\text{S}_2\text{O}_3)]] \cdot \text{H}_2\text{O}$  (2) in  $\text{D}_2\text{O}$ .

*FT-IR Spectroscopy*

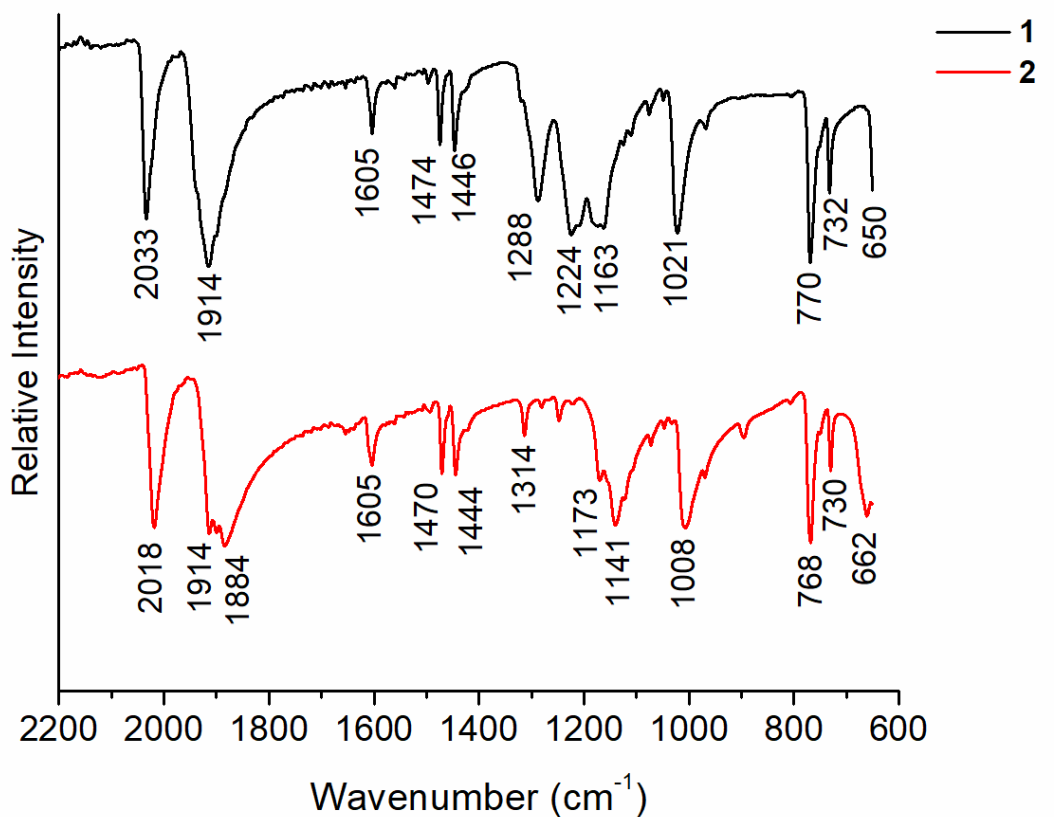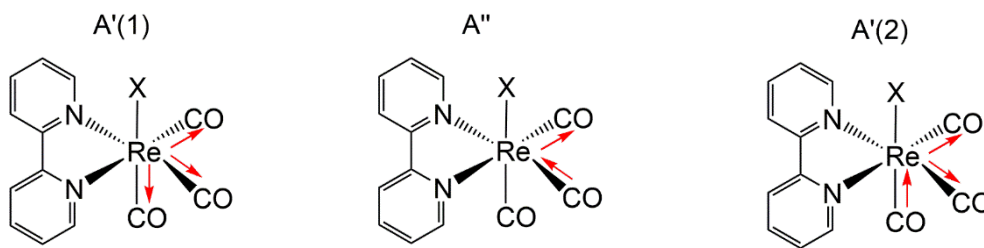

| Compound | A'(1) = totally symmetric in-phase $\nu(\text{CO})$ , $\text{cm}^{-1}$ | A'' = asymmetric vibration of equatorial CO ligands, $\text{cm}^{-1}$ | A'(2) = totally symmetric out-of-phase $\nu(\text{CO})$ , $\text{cm}^{-1}$ |
|----------|------------------------------------------------------------------------|-----------------------------------------------------------------------|----------------------------------------------------------------------------|
| <b>1</b> | 2033                                                                   | 1914                                                                  | 1914                                                                       |
| <b>2</b> | 2018                                                                   | 1914                                                                  | 1884                                                                       |

**Figure S2.** FT-IR spectra of *fac*-[Re(CO)<sub>3</sub>(bpy)(H<sub>2</sub>O)](CF<sub>3</sub>SO<sub>3</sub>) (**1**) and Na(*fac*-[Re(CO)<sub>3</sub>(bpy)(S<sub>2</sub>O<sub>3</sub>)]·H<sub>2</sub>O) (**2**) and corresponding  $\nu(\text{CO})$  vibrational modes.<sup>4,5</sup>

### Electro-spray Ionization Mass Spectrometry (ESI-MS)

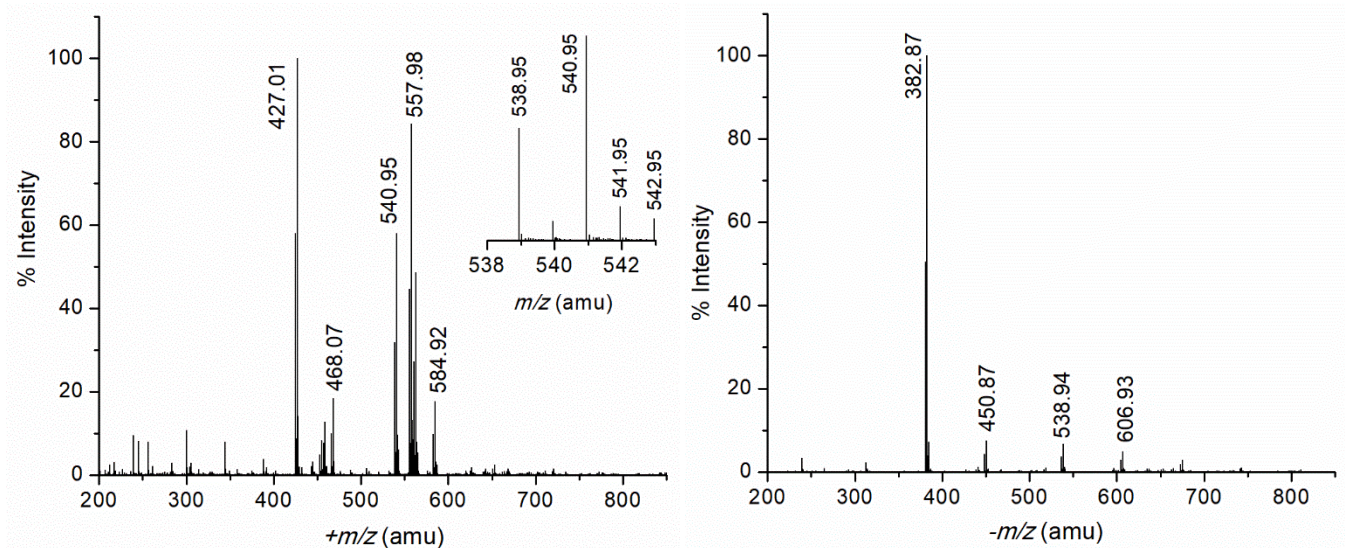

**Figure S3.** ESI mass spectra of  $\text{Na}(\text{fac}-[\text{Re}(\text{CO})_3(\text{bpy})(\text{S}_2\text{O}_3)]) \cdot \text{H}_2\text{O}$  (**2**) in (+) and (-) ion modes.

**Table S7.** Assignments of mass peaks in the ESI-mass spectra shown in Figure S3.<sup>a</sup>

| +m/z             | Assignment                                                                                                    | -m/z   | Assignment                                                                                                        |
|------------------|---------------------------------------------------------------------------------------------------------------|--------|-------------------------------------------------------------------------------------------------------------------|
| <i>Complex 2</i> |                                                                                                               |        |                                                                                                                   |
| 427.01           | $[\text{Re}^{\text{I}} + 3\text{CO} + \text{bpy}]^+$                                                          | 382.87 | $[\text{Re}^{\text{I}} + 3\text{CO} + \text{S}_2\text{O}_3^{2-}]^-$                                               |
| 468.07           | $[\text{Re}^{\text{I}} + 3\text{CO} + \text{bpy} + \text{CH}_3\text{CN}]^+$<br>(Calc = 468.04)                | 450.87 | $[\text{Re}^{\text{I}} + 4\text{CO} + \text{S}_2\text{O}_3^{2-} + \text{NaOH}]^-$<br>(Calc = 450.86)              |
| 540.95           | $[\text{Re}^{\text{I}} + 3\text{CO} + \text{bpy} + \text{S}_2\text{O}_3^{2-} + 2\text{H}^+]^+$                | 538.94 | $[\text{Re}^{\text{I}} + 3\text{CO} + \text{bpy} + \text{S}_2\text{O}_3^{2-}]^-$                                  |
| 557.98           | $[\text{Re}^{\text{I}} + 3\text{CO} + \text{bpy} + \text{S}_2\text{O}_3^{2-} + \text{NH}_4^+ + \text{H}^+]^+$ | 606.94 | $[\text{Re}^{\text{I}} + 4\text{CO} + \text{bpy} + \text{S}_2\text{O}_3^{2-} + \text{NaOH}]^-$<br>(Calc = 606.93) |
| 584.92           | $[\text{Re}^{\text{I}} + 3\text{CO} + \text{bpy} + \text{S}_2\text{O}_3^{2-} + 2\text{Na}^+]^+$               |        |                                                                                                                   |

<sup>a</sup> bpy =  $\text{C}_{10}\text{H}_8\text{N}_2$

*Thermal Gravimetric Analysis (TGA)*

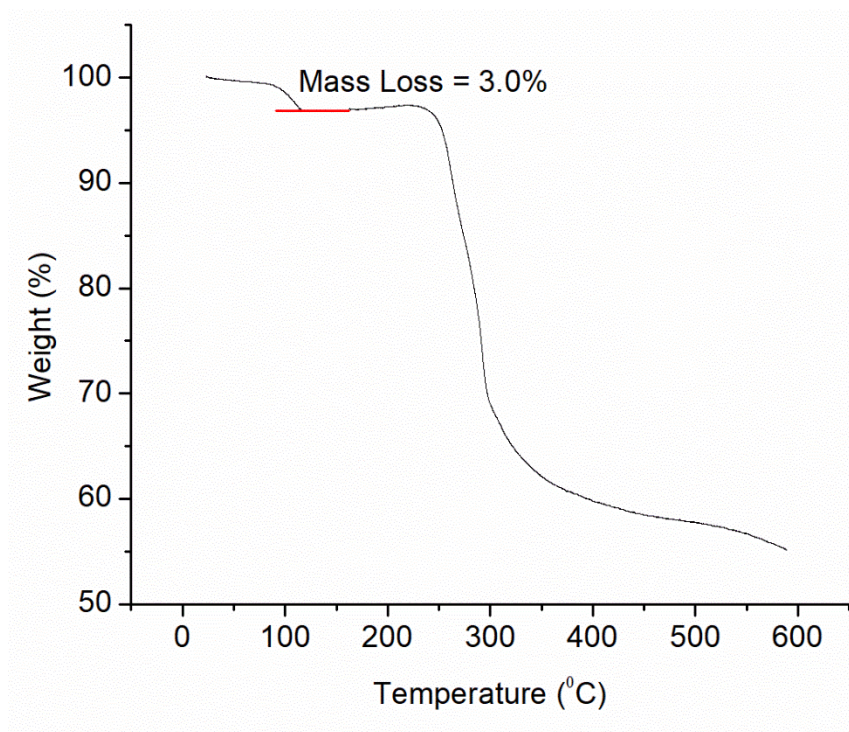

**Figure S4.** Thermogravimetric analysis (TGA) of  $\text{Na}(\text{fac}-[\text{Re}(\text{CO})_3(\text{bpy})(\text{S}_2\text{O}_3)]) \cdot \text{H}_2\text{O}$  (**2**).

## Synchrotron Based X-ray Fluorescence Microscopy (XFM)

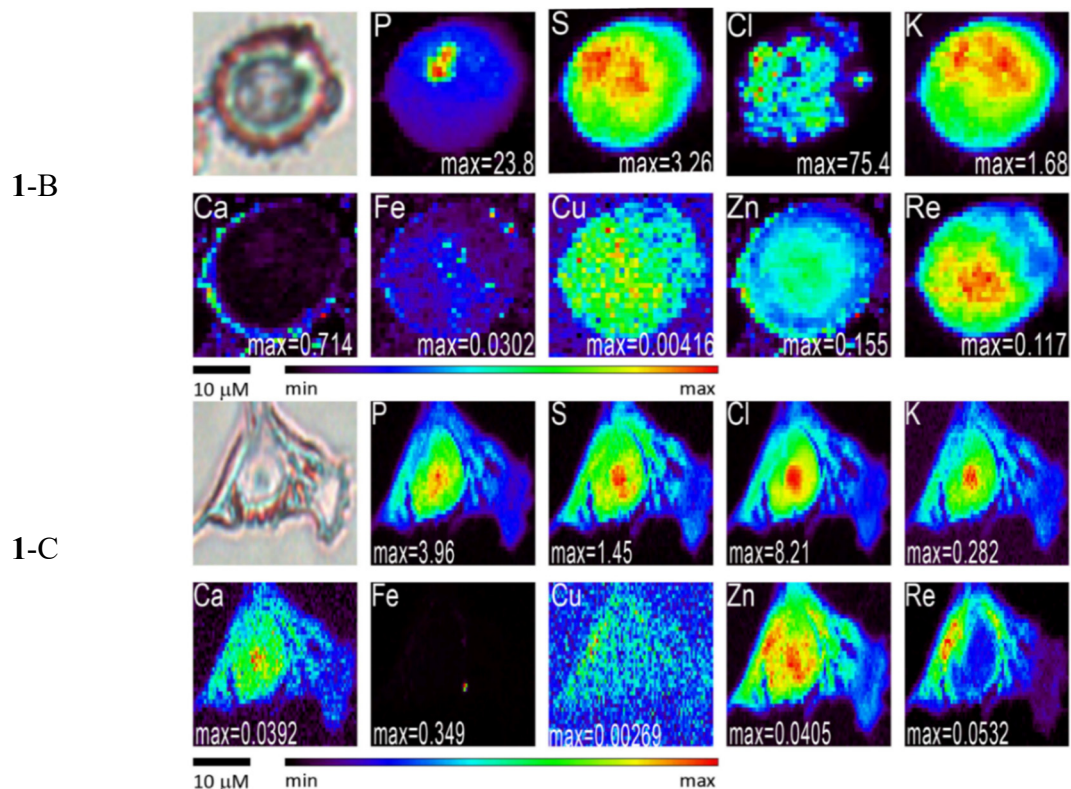

**Figure S5 (a).** Optical micrographs (*top left*) and XFM elemental distribution map of two MDA-MB-231 cells (**1-B** and **1-C**) treated with **1** for 6 h. The maximum elemental area densities (quantified from standards and expressed in  $\mu\text{g cm}^{-2}$ ) are given in the bottom of each map. The scale bar represents 10  $\mu\text{M}$  unless otherwise indicated. Images were reproduced by permission from Springer: Capper, M. S. et al. Cytotoxicity, cellular localization and photophysical properties of Re(I) tricarbonyl complexes bound to cysteine and its derivatives. *J. Biol. Inorg. Chem.* 2020, [25, 759](#).<sup>5</sup>

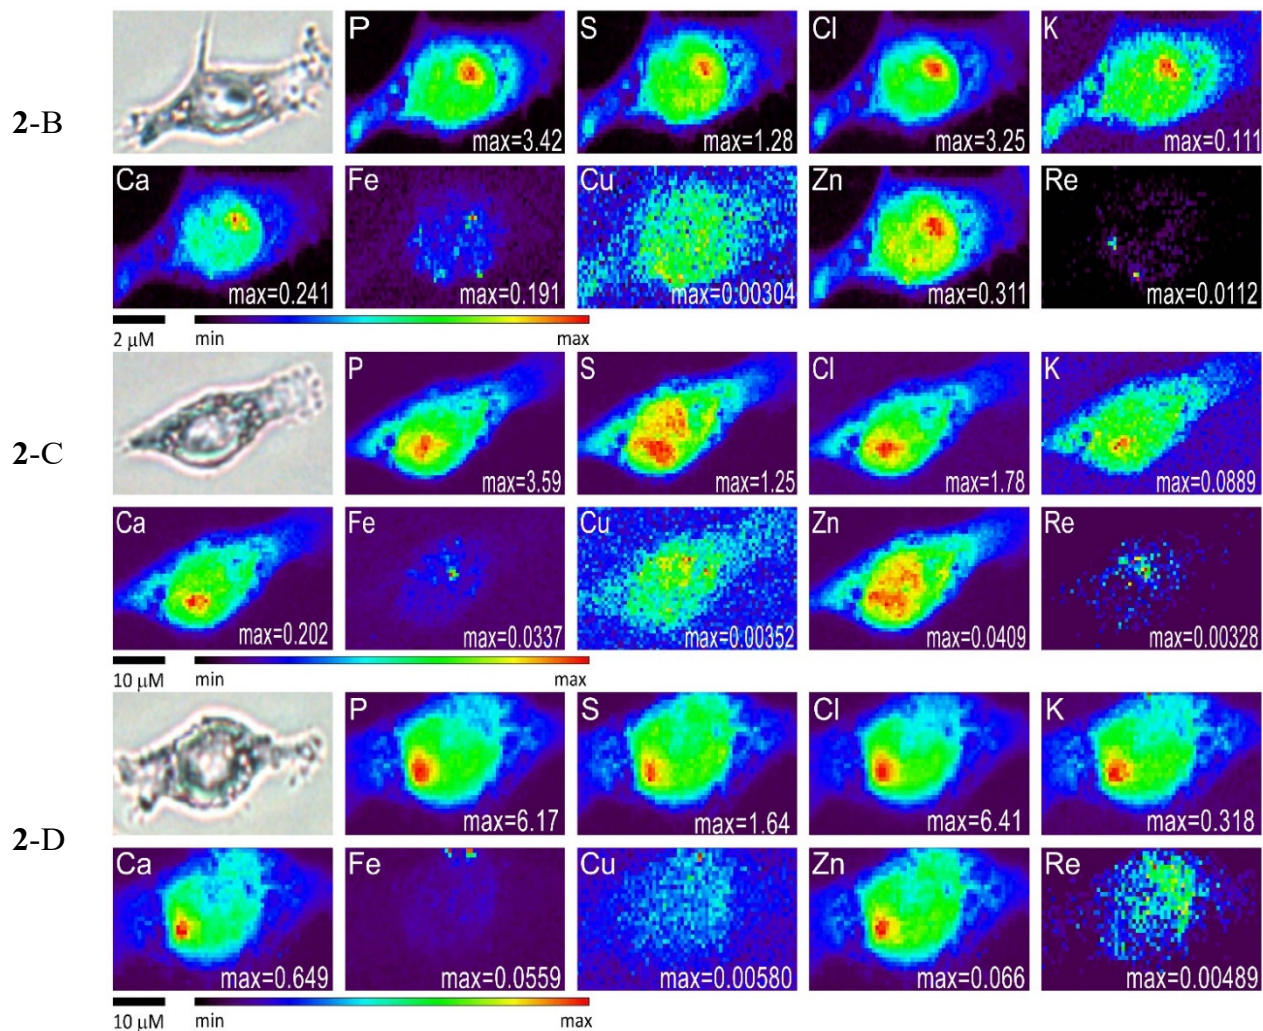

**Figure S5 (b).** Optical micrographs (*top left*) and XFM elemental distribution map of three MDA-MB-231 cells (2-B, 2-C and 2-D) treated with 2 for 6 h. The maximum elemental area densities (quantified from standards and expressed in  $\mu\text{g cm}^{-2}$ ) are given in the bottom of each map. The scale bar represents 10  $\mu\text{m}$  unless otherwise indicated.



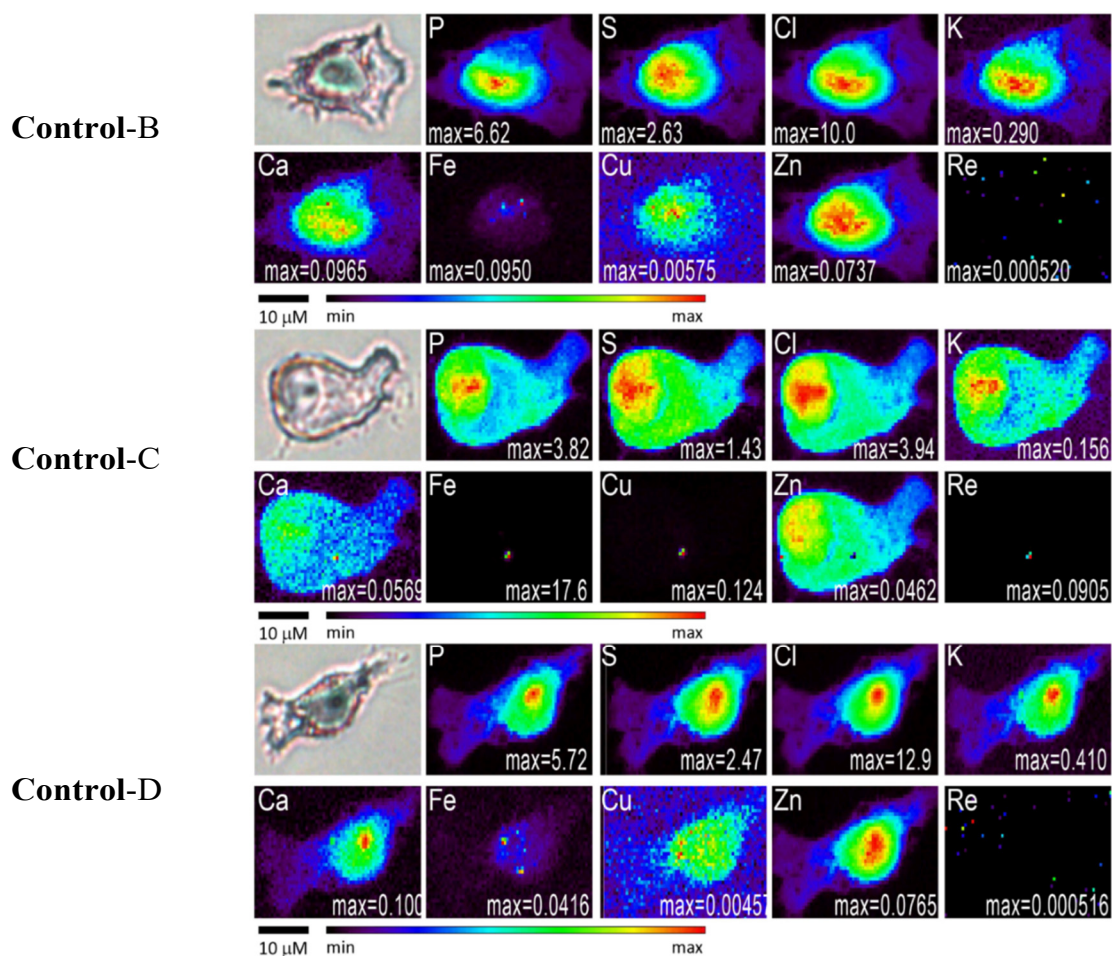

**Figure S5 (c).** Optical micrographs (*top left*) and XFM elemental distribution map of three MDA-MB-231 cells (**Control-B**, **Control-C** and **Control-D**) treated with DMEM for 6 h. The maximum elemental area densities (quantified from standards and expressed in  $\mu\text{g cm}^{-2}$ ) are given in the bottom of each map. The scale bar represents 10  $\mu\text{m}$  unless otherwise indicated. Images were reproduced by permission from Springer: Capper, M. S. et al. Cytotoxicity, cellular localization and photophysical properties of Re(I) tricarbonyl complexes bound to cysteine and its derivatives. *J. Biol. Inorg. Chem.* 2020, 25, 759. <sup>5</sup>

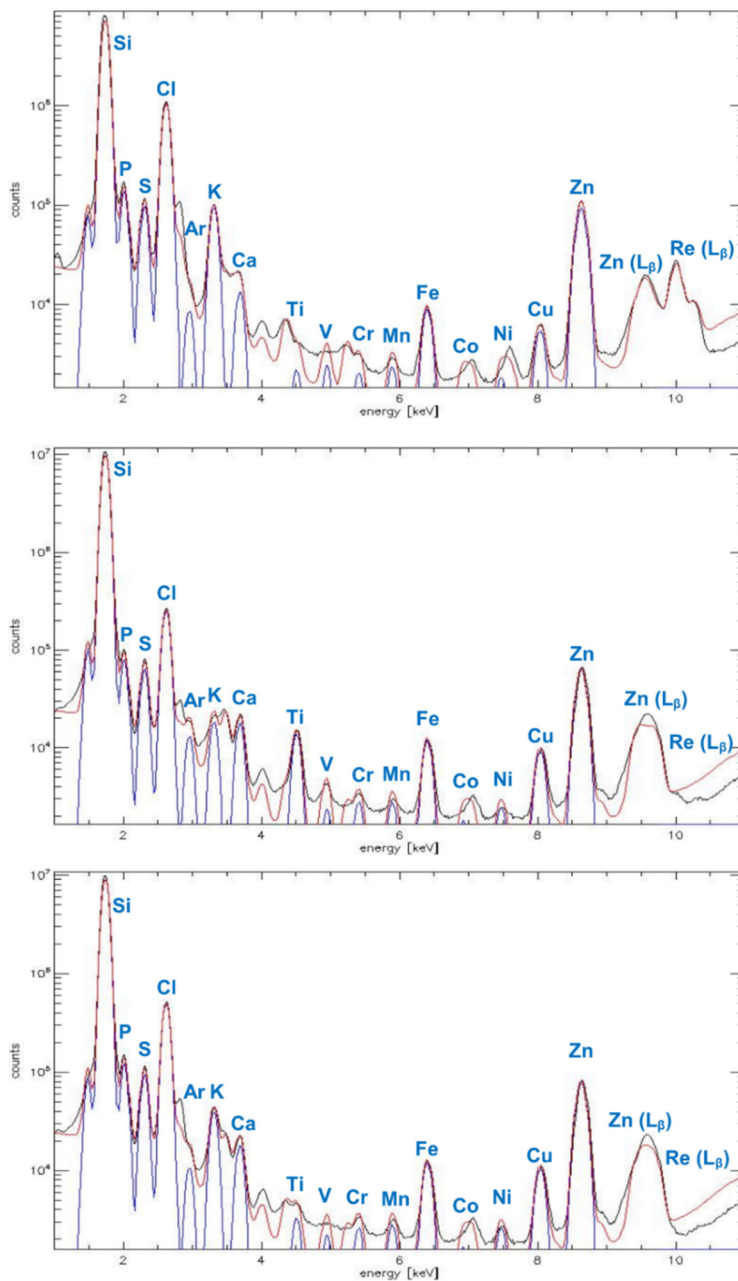

**Figure S6.** XFM spectra (black) of MDA-MB-231 sample cells treated for 6 h with 20  $\mu$ M solutions of **1** (*top*) and **2** (*middle*) or in DMEM (*bottom*). Each figure shows the fit to the spectrum (red) and the contribution of the  $K_{\alpha}$  and  $L_{\beta}$  peaks used in the fitting (blue) with their corresponding labelling. Images for **1** and control were reproduced by permission from Springer: Capper, M. S. et al. Cytotoxicity, cellular localization and photophysical properties of Re(I) tricarbonyl complexes bound to cysteine and its derivatives. *J. Biol. Inorg. Chem.* 2020, 25, 759.<sup>5</sup>

## References

1. T. D. W. Claridge, in *High-Resolution NMR Techniques in Organic Chemistry*, ed. T. D. W. Claridge, Elsevier Boston, 3 edn., 2016, ch. 3, p. 61–132.
2. In *The Merck Index: An Encyclopedia of Chemicals, Drugs, and Biologicals* 14 ed.; O’Neil, M. J.; Heckelman, P. E.; Koch, C. B.; Roman, K. J., Eds. Merck Co., Inc.: Whitehouse Station, NJ 2006.
3. J. Manura and D. Manura, *Scientific Instrument Services*, 1996-2009.
4. A. Vlček, in *Topics in Organometallic Chemistry: Photophysics of Organometallics*, ed. A. J. Lees, Springer - Verlag, Berlin, Heidelberg, 2010, pp. 73 - 114.
5. M. S. Capper, A. Enriquez Garcia, N. Macia, B. Lai, J.-B. Lin, M. Nomura, A. Alihosseinzadeh, S. Ponnurangam, B. Heyne, C. S. Shemanko and F. Jalilehvand, *J. Biol. Inorg. Chem.*, 2020, **25**, 759-776.
